# Supplementary material
Source: MDPI journal article supplement (https://www.mdpi.com/2072-4292/6/6/5633)
Supplement: s2 [file s2]

## **Remote Sensing Assessment of Forest Disturbance Across Complex Mountainous Terrain: The Pattern and Severity of Impacts of Tropical Cyclone Yasi on Australian Rainforests. *Remote Sensing*, 2014, 6, 5633–5649**

**Robinson I. Negrón-Juárez <sup>1,2,\*</sup>, Jeffrey Q. Chambers <sup>1</sup>, George C. Hurtt <sup>3</sup>,  
Bachir Annane <sup>4</sup>, Stephen Cocke <sup>5</sup>, Mark Powell <sup>6</sup>, Michael Stott <sup>7</sup>,  
Stephen Goosem <sup>7</sup>, Daniel J. Metcalfe <sup>8</sup> and Sassan S. Saatchi <sup>9</sup>**

<sup>1</sup> Climate Sciences Department, Earth Sciences Division, Lawrence Berkeley National Laboratory, 1 Cyclotron Rd., MS 50-4037, Berkeley, CA 94720, USA; E-Mail: jchambers@lbl.gov

<sup>2</sup> Department of Ecology and Evolutionary Biology, Tulane University, 6489 Saint Charles Av., New Orleans, LA 70118, USA

<sup>3</sup> Department of Geographical Sciences, University of Maryland, 2181 LeFrak Hall, College Park, MD 20742, USA; E-Mail: gchurtt@umd.edu

<sup>4</sup> Cooperative Institute for Marine and Atmospheric Studies (CIMAS), University of Miami, Coral Gables, FL 33149, USA; E-Mail: Bachir.Annane@noaa.gov

<sup>5</sup> Center for Ocean-Atmospheric Prediction Studies (COAPS), Florida State University, 2035 E. Paul Dirac Dr., 200 RM Johnson Bldg., Tallahassee, FL 32306, USA; E-Mail: scocke@fsu.edu

<sup>6</sup> Hurricane Research Division, National Oceanic and Atmospheric Administration, 4301 Rickenbacker Causeway, Miami, FL 33149, USA; E-Mail: Mark.Powell@noaa.gov

<sup>7</sup> Wet Tropics Management Authority, 1st Floor, Cairns Corporative Tower, 15 Lake St., P.O. Box 2050, Cairns, QLD 4870, Australia; E-Mails: mike.stott@wtma.qld.gov.au (M.S.); steve.goosem@wtma.qld.gov.au (S.J.)

<sup>8</sup> CSIRO Ecosystem Sciences–EcoSciences Precinct, 41 Boggo Road, Dutton Park, QLD 4102, Australia; E-Mail: dan.metcalfe@csiro.au

<sup>9</sup> Jet Propulsion Laboratory, California Institute of Technology, 4800 Oak Grove Drive, Pasadena, CA 91109, USA; E-Mail: Sasan.S.Saatchi@jpl.nasa.gov

\* Author to whom correspondence should be addressed; E-Mail: robinson.inj@lbl.gov  
Tel.: +1-510-486-4000; Fax +1-510-486-5686.

---

**Table S1.** Stem Density (for trees with DBH  $\geq 10$  cm) in US. Gulf Coast (Alabama, Florida, Louisiana, Mississippi and Texas) Forest Ecosystems. Data from the U.S Forest Inventory and Analysis National Program (FIA) [1] using the EVALIDator tool (see report below).

| Stand Origin                              | Ratio Estimate | Sampling Error | Variance |
|-------------------------------------------|----------------|----------------|----------|
| Total                                     | 152.331        | 6.23E-01       | 8.99E-01 |
| Natural stands                            | 137.104 *      | 6.64E-01       | 8.30E-01 |
| Clear evidence of artificial regeneration | 220.209        | 1.40E+00       | 9.48E+00 |

\*137.104 trees/acre = 338.51 trees/ha

EVALIDator Version 1.5.1.2a View report:

Area: RSCD=33 EVALID=11001\_ ALABAMA 2001;2002;2003;2004;2005;2006;2007;2008;2009;2010#

RSCD=33 EVALID=121001 FLORIDA 2002;2003;2004;2006;2007;2009;2010#

RSCD=33 EVALID=221001 LOUISIANA 2001;2002;2003;2004;2005;2008;2009;2010#

RSCD=33 EVALID=281001 MISSISSIPPI 2006;2009;2010#

RSCD=33 EVALID=481001 TEXAS 2004;2005;2006;2007;2008;2009;2010#

Numerator: Number of live trees (at least 1 inch d.b.h./d.r.c.), in trees, on forest land

Denominator: Area of forest land, in acres

Classification: Stand origin

No filter used for both numerator and denominator.

Filter used only for numerator: and tree.dia  $\geq 3.9$  (10 cm)

**Figure S1.** Total carbon storage map. Total above and belowground biomass and its' uncertainty for the Australian rainforest study area [2,3]. Using these maps, forested areas impacted by Yasi wind speeds  $\geq 18$  m/s were found to contain between 124 and 264 MgC/ha.

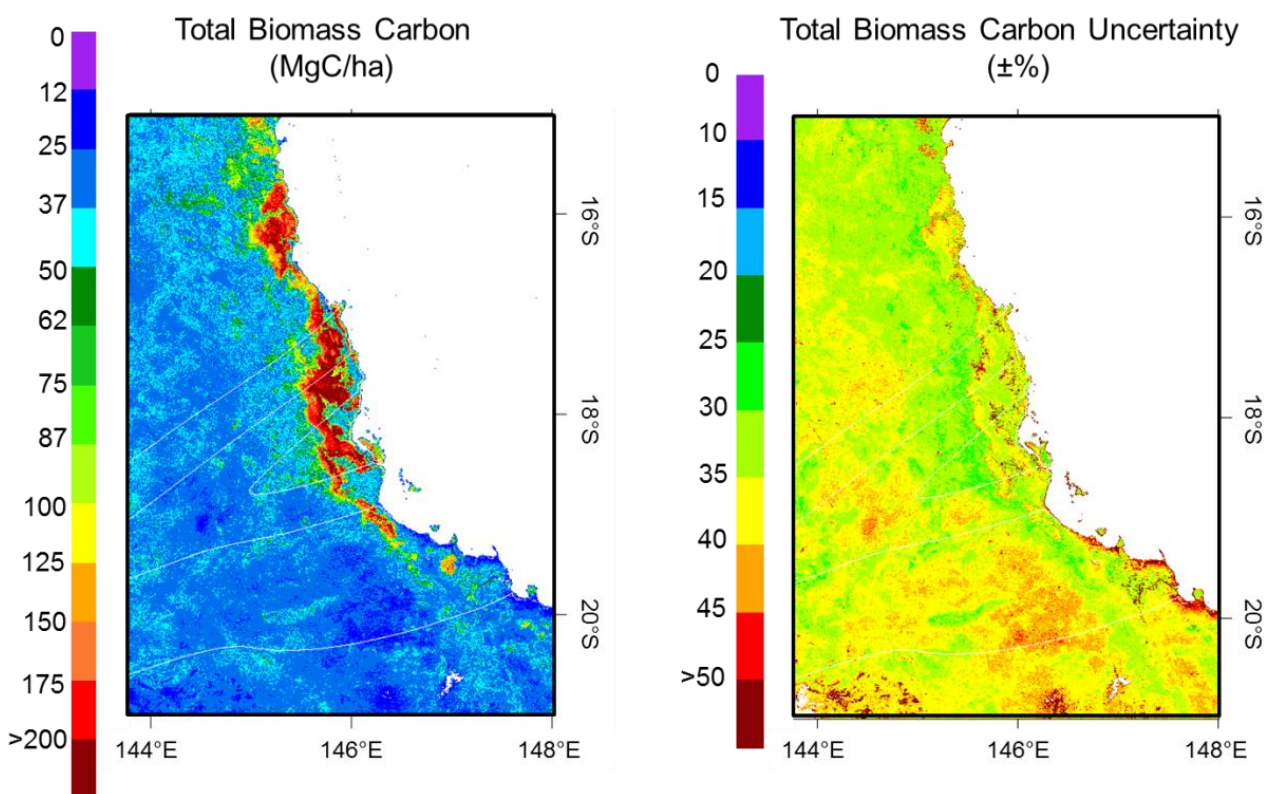

**Figure S2.** Stem density in rainforested areas affected by Yasi. Inset shows the forested area affected by wind speeds  $\geq 18$  m/s. Evergreen Broadleaf forests (green areas) were classified using the MODIS Land cover type (MCD12Q1) yearly L3 500 m SIN V005 data (MCD12Q1) for 2009. Three MODIS scenes (h31v10, h31v11 and h32v10) were used to compose this map, which shows the location of the CSIRO permanent plots affected by Yasi (wind  $\geq 18$  m/s) and the location of the transect used in this study. The table lists the range of stem densities from the CSIRO permanent plot network [4] and from this study's transect. The range of stem densities varied from 408 to 1080, and this overall stem density range was used in our calculations.

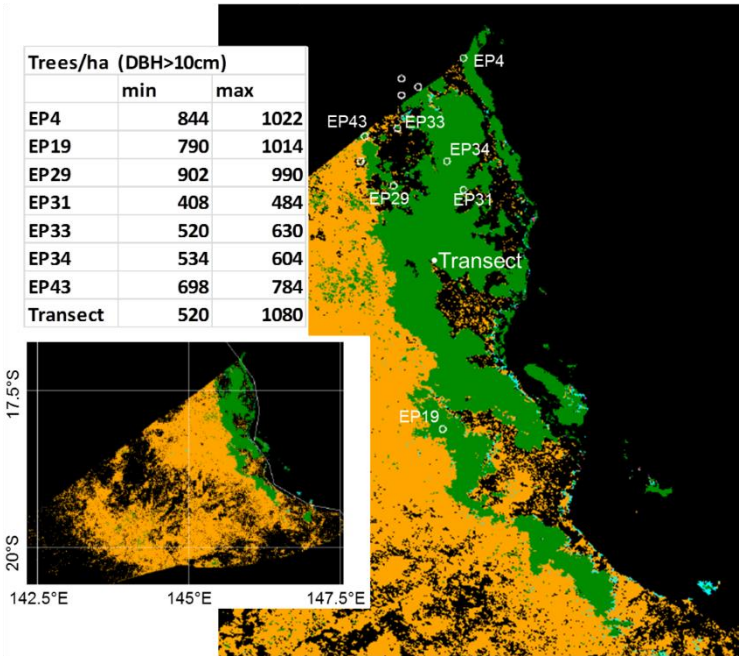

**Figure S3.** Tree Mortality Map associated with Yasi. (a) Tree mortality (%) and (b) associated standard deviation. The standard errors from all scaling regressions were included and the mortality was calculated after 10,000 interactions per pixel (MODIS- $\Delta$ NPV) using a Monte Carlo simulation. Tree mortality was not calculated over forested areas affected by cloud cover (dark green) in either pre or post Yasi images. Water is shown in black and land cover types other than tropical forests are shown in intensities of gray obtained using MCD12Q1.

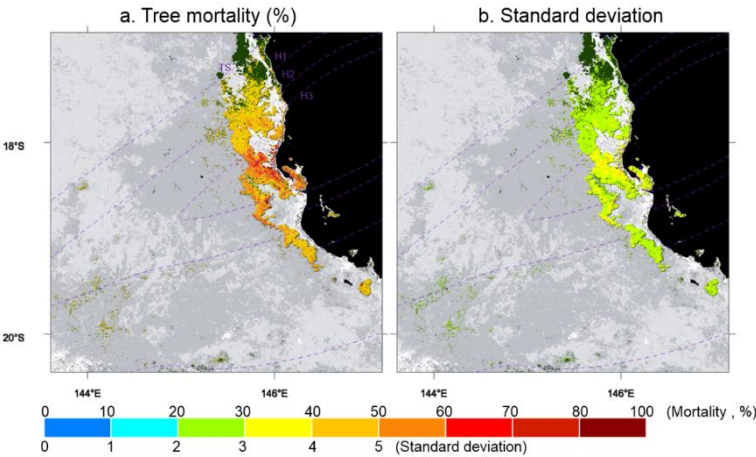

**Figure S4.** The relationship between field-measured mortality and Landsat  $\Delta$ NPV in U.S. Gulf Coast forest ecosystems. Sixty plots were established to study the effect of tropical cyclones Katrina, Rita and Gustav, 12 of these plots were located in modified areas and were excluded [5]. The regression was forced to zero for consistence with the present study.

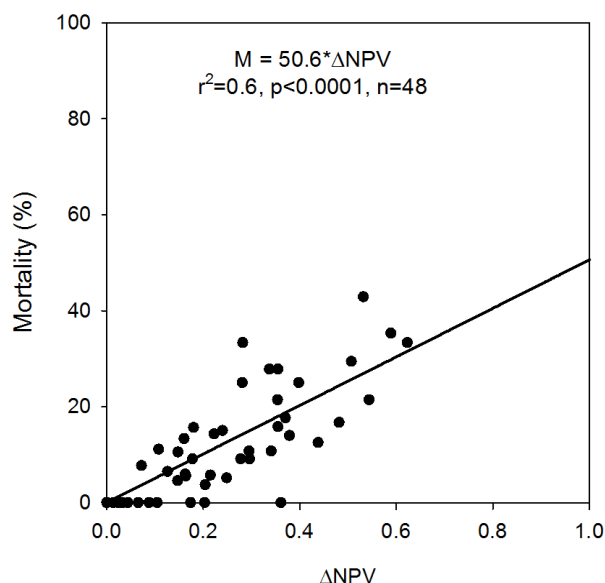

**Figure S5.** Comparison of hurricane landfalls in tropical (red areas) and subtropical forests (blue area). Individual tropical storms from 1850 to 2011 with wind speeds  $\geq 18$  m/s at landfall were considered. Hurricane track data from the International Best Track Archive for Climate Stewardship (IBTrACS) [6] was used. The Gulf Coast forest has twice the number of landfall cases than the tropical rainforests in Central America. Central American rainforests had 2.5 more hurricane landfalls than Australian rainforests over this time period.

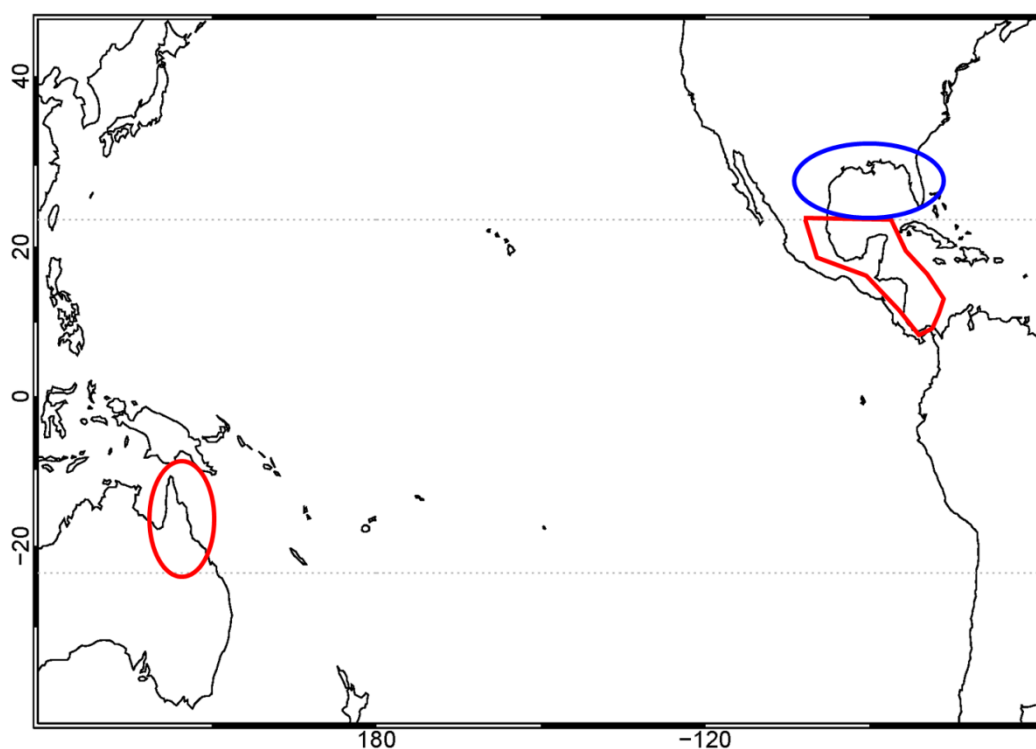

## References

1. Forest Inventory and Analysis National Program. Available online: <http://www.fia.fs.fed.us> (accessed on 5 December 2013).
2. Saatchi, S.; Harrys, N.; Brown, S.; Lefsky, M.; Mitchard, E.; Salas, W.; Zutta, B.; Buemann, W.; Lewis, S.; Hagen, S.; *et al.* Benchmark map of forest carbon stock in tropical regions across three continents. *Proc. Natl. Acad. Sci. USA* **2011**, *108*, 9899–9904.
3. Carbon/Datasets. Available online: <ftp://www-radar.jpl.nasa.gov/projects/carbon/datasets/> (accessed on 5 December 2013).
4. Graham, A.W. *The CSIRO Rainforest Permanent Plots of North Queensland—Site, Structural, Floristic and Edaphic Descriptions*. CSIRO and the Cooperative Research Centre for Tropical Rainforest Ecology and Management: Cairns, Australia, 2006.
5. Negrón-Juárez, R.; Baker, D.; Zeng, H.; Henkel, T.; Chambers, J. Assessing hurricane-induced tree mortality in U.S. Gulf Coast forest ecosystems. *J. Geophys. Res. Biogeo.* **2010**, *115*, doi:10.1029/2009JG001221.
6. International Best Track Archive for Climate Stewardship (IBTrACS). Available online: <http://www.ncdc.noaa.gov/ibtracs> (accessed on 5 December 2013).

© 2014 by the authors; licensee MDPI, Basel, Switzerland. This article is an open access article distributed under the terms and conditions of the Creative Commons Attribution license (<http://creativecommons.org/licenses/by/3.0/>).
